# Supplementary material for: Practising pastoralism in an agricultural environment: An isotopic analysis of the impact of the Hunnic incursions on Pannonian populations
Source: PubMed Central journal article supplement (PMC5362200; doi:10.1371/journal.pone.0173079), 2017-03-22
Supplement: pone.0173079.s003.pdf [file pone.0173079.s003.pdf]

**S1 Table. Tooth formation patterns in humans**

|                 | <b>Tooth</b> | <b>Crown begins to form</b> | <b>Crown complete</b> | <b>Root complete</b> |
|-----------------|--------------|-----------------------------|-----------------------|----------------------|
| <b>Maxilla</b>  | <b>P2</b>    | 2-2.25                      | 6-7                   | 12-14                |
|                 | <b>M2</b>    | 2.5-3                       | 7-8                   | 14-16                |
|                 | <b>M3</b>    | 7-9                         | 12-16                 | 18-25                |
| <b>Mandible</b> | <b>P2</b>    | 2.25-2.5                    | 6-7                   | 13-14                |
|                 | <b>M2</b>    | 2.5-3                       | 7-8                   | 14-15                |
|                 | <b>M3</b>    | 8-10                        | 12-16                 | 18-25                |

Ages given in years
