# Supplementary material for: Practising pastoralism in an agricultural environment: An isotopic analysis of the impact of the Hunnic incursions on Pannonian populations
Source: PubMed Central journal article supplement (PMC5362200; doi:10.1371/journal.pone.0173079), 2017-03-22
Supplement: pone.0173079.s005.pdf [file pone.0173079.s005.pdf]

**S3 Table. Summary isotopic data for cattle and ovicaprids at the five sites**

|                   | $\delta^{13}\text{C}$ (‰) |            |       |       |       | $\delta^{15}\text{N}$ (‰) |            |     |      |       | n  |
|-------------------|---------------------------|------------|-------|-------|-------|---------------------------|------------|-----|------|-------|----|
|                   | mean                      | 1 $\sigma$ | min   | max   | range | mean                      | 1 $\sigma$ | min | max  | range |    |
| <b>Keszthely:</b> |                           |            |       |       |       |                           |            |     |      |       |    |
| fauna:            |                           |            |       |       |       |                           |            |     |      |       |    |
| <b>Bos</b>        | -20.1                     | 0.7        | -21.0 | -18.8 | 2.3   | 6.3                       | 0.8        | 5.1 | 7.3  | 2.3   | 5  |
| <b>Ovicaprid</b>  | -20.4                     | 0.4        | -20.6 | -19.7 | 1.0   | 7.1                       | 1.1        | 6.3 | 9.0  | 2.7   | 4  |
| <b>combined</b>   | -20.2                     | 0.6        | -21.0 | -18.8 | 2.3   | 6.7                       | 1.0        | 5.1 | 9.0  | 3.9   | 9  |
| <b>Győr:</b>      |                           |            |       |       |       |                           |            |     |      |       |    |
| fauna:            |                           |            |       |       |       |                           |            |     |      |       |    |
| <b>Bos</b>        | -19.0                     | 1.5        | -20.9 | -16.7 | 4.2   | 7.1                       | 0.8        | 5.3 | 8.0  | 2.7   | 8  |
| <b>Ovicaprid</b>  | -20.1                     | 1.2        | -21.4 | -18.0 | 3.4   | 8.0                       | 1.7        | 5.7 | 10.8 | 5.1   | 6  |
| <b>combined</b>   | -19.4                     | 1.5        | -21.4 | -16.7 | 4.7   | 7.5                       | 1.4        | 5.3 | 10.8 | 5.5   | 14 |
| <b>Mözs:</b>      |                           |            |       |       |       |                           |            |     |      |       |    |
| fauna:            |                           |            |       |       |       |                           |            |     |      |       |    |
| <b>Bos</b>        | -19.8                     | 0.9        | -20.8 | -17.7 | 3.1   | 6.9                       | 0.6        | 5.8 | 7.9  | 2.0   | 7  |
| <b>Ovicaprid</b>  | -20.5                     | 0.2        | -20.8 | -20.4 | 0.4   | 7.5                       | 0.4        | 7.0 | 8.0  | 1.0   | 4  |
| <b>combined</b>   | -20.1                     | 0.8        | -20.8 | -17.7 | 3.1   | 7.1                       | 0.6        | 5.8 | 8.0  | 2.2   | 11 |
| <b>Szolnok:</b>   |                           |            |       |       |       |                           |            |     |      |       |    |
| fauna:            |                           |            |       |       |       |                           |            |     |      |       |    |
| <b>Bos</b>        | -20.2                     | 0.4        | -20.9 | -19.7 | 1.2   | 7.6                       | 0.4        | 7.1 | 8.2  | 1.0   | 5  |
| <b>Ovicaprid</b>  | -20.2                     | 0.6        | -21.1 | -19.0 | 2.1   | 8.2                       | 0.8        | 6.9 | 9.1  | 2.2   | 7  |
| <b>combined</b>   | -20.2                     | 0.6        | -21.1 | -19.0 | 2.1   | 7.9                       | 0.8        | 6.9 | 9.1  | 2.2   | 12 |
